# Supplementary material for: Metabolomics and Dual RNA-Sequencing on Root Nodules Revealed New Cellular Functions Controlled by Paraburkholderia phymatum NifA
Source: MDPI journal article supplement (doi:10.3390/metabo11070455), 2021-07-15
Supplement: s1 [file s1]

**Table S7:** Bacterial strains, plasmids and primers used in this work

| Strain or plasmid                | Description                                                                          | Reference  |
|----------------------------------|--------------------------------------------------------------------------------------|------------|
| <b>Strains</b>                   |                                                                                      |            |
| <i>Escherichia coli</i>          |                                                                                      |            |
| Top10                            | $\Delta lacX74$ <i>ara</i> $\Delta 139\Delta$ ( <i>ara-leu</i> )                     | Invitrogen |
| <i>Paraburkholderia phymatum</i> |                                                                                      |            |
| STM815                           | Wild type                                                                            | [1]        |
| STM815-nifA <sub>RP</sub>        | <i>nifA</i> <sub>RP</sub> ::pSHAFT2 mutant of STM815; Cm <sup>R</sup>                | [2]        |
| STM815-nifA <sub>RP</sub> -comp  | STM815-nifA <sub>RP</sub> mutant harboring pBBR1MCS-2- <i>nifA</i> ; Km <sup>R</sup> | This study |
| <b>Plasmids</b>                  |                                                                                      |            |
| pBBR1MCS-2                       | Broad host-range cloning vector; Km <sup>R</sup>                                     | [3]        |
| pRK2013                          | Helper plasmid; Km <sup>R</sup>                                                      | [4]        |
| pBBR1MCS-2- <i>nifA</i>          | pBBR1MCS-2 containing <i>nifA</i> (Bphy_7728) for complementation; Km <sup>R</sup>   | This study |
| <b>Primers</b>                   |                                                                                      |            |
| nifA_comp_F_HindIII              | AAAAaagcttAATGCAAAAACGAGGCGTAG                                                       | This study |
| nifA_comp_R_XbaI                 | GGGGtctagaATGTACTCACGGGCCTTTG                                                        | This study |

<sup>1</sup>restriction sites are in lower letters.

## References

1. Moulin, L.; Munive, A.; Dreyfus, B.; Boivin-Masson, C. Nodulation of legumes by members of the beta-subclass of Proteobacteria. *Nature* **2001**, *411*, 948, doi:https://doi.org/10.1038/35082070.
2. Lardi, M.; Liu, Y.; Purtschert, G.; de Campos, S.B.; Pessi, G. Transcriptome analysis of *Paraburkholderia phymatum* under nitrogen starvation and during symbiosis with *Phaseolus vulgaris*. *Genes (Basel)*. **2017**, *8*, doi:10.3390/genes8120389.
3. Elzer, P.H.; Roop, R.M.; Kovach, M.E.; Robertson, G.T.; Peterson, K.M.; Steven Hill, D.; Farris, M.A. Four new derivatives of the broad-host-range cloning vector pBBR1MCS, carrying different antibiotic-resistance cassettes. *Gene* **1995**, *166*, 175–176, doi:10.1016/0378-1119(95)00584-1.
4. Phadnis, S.H.; Berg, D.E. Identification of base pairs in the outside end of insertion sequence IS50 that are needed for IS50 and Tn5 transposition. *Proc. Natl. Acad. Sci. USA*. **1987**, *84*, 9118–9122, doi:10.1073/pnas.84.24.9118.
